# Supplementary material for: A supramolecular system of tetrathiafulvalene, assembled by hydrogen bonding, ionic coordination bonding and topological cooperation
Source: Royal Society of Chemistry journal article supplement (doi:10.1039/b604258a), 2006-01-01
Supplement: b604258a.pdf [file b604258a.pdf]

## Supplementary data

A concentration change method was used in order to confirm the exact stoichiometry of the complex. The concentration of **1** in the experiments was maintained constant to minimize the effect of **1**, while the concentration of beta changed successively. The experiments were carried out in the higher concentration of **1** that was in the same magnitude order as that in preparation of the compound ( $10^{-2}$  M), because at lower concentration of **1** the turning point of the absorbance-concentration (beta) curve is not so obvious.

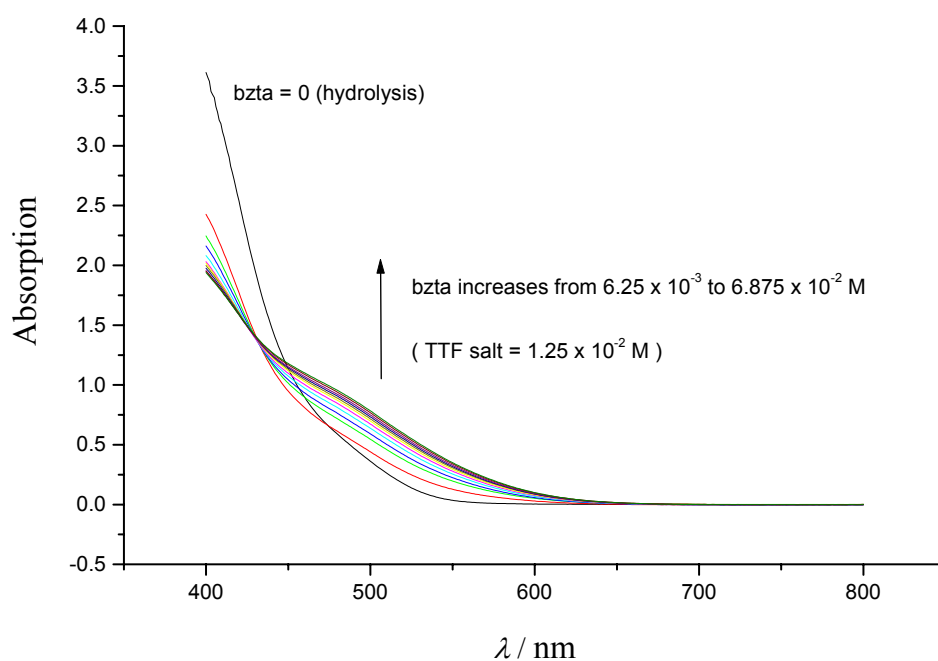

Vis spectura in higher concentration of the TTF salt (comparing with those in Fig. 1)

**SI-Fig. 1** Electronic spectra of the salt **1** ( $1.25 \times 10^{-2}$  M) in H<sub>2</sub>O-CH<sub>3</sub>CN (1:1 v/v) with the increased concentration of bzta: 0,  $0.625 \times 10^{-2}$ ,  $1.25 \times 10^{-2}$ ,  $1.875 \times 10^{-2}$ ,  $2.50 \times 10^{-2}$ ,  $3.125 \times 10^{-2}$ ,  $3.75 \times 10^{-2}$ ,  $4.375 \times 10^{-2}$ ,  $5.00 \times 10^{-2}$ ,  $5.625 \times 10^{-2}$ ,  $6.25 \times 10^{-2}$  and  $6.875 \times 10^{-2}$ , respectively.

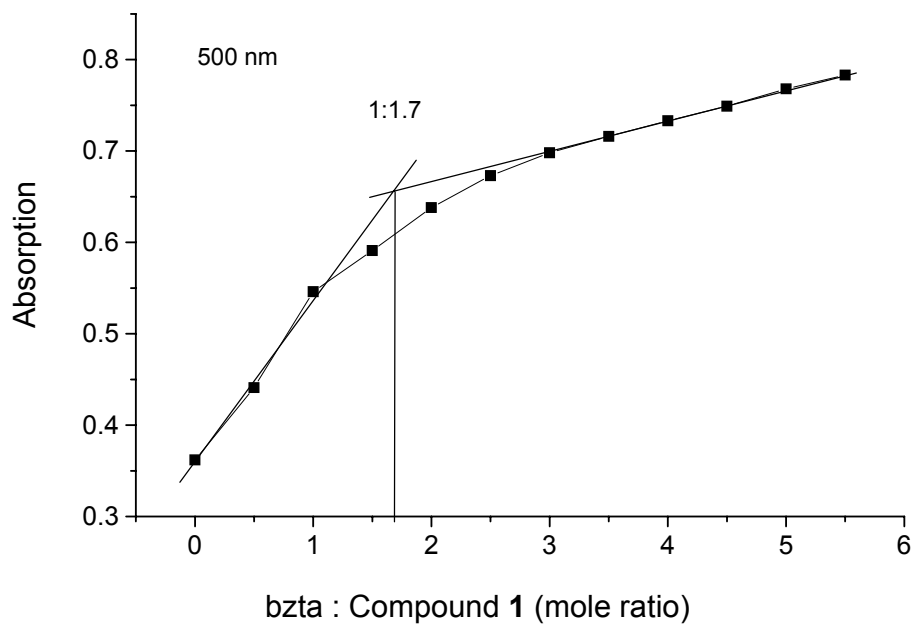

(a)

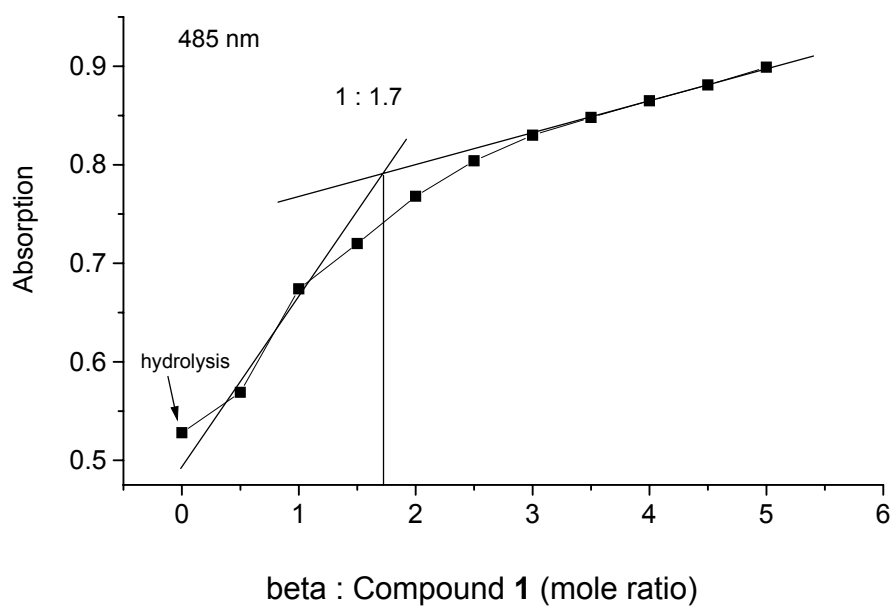

(b)

SI-Fig. 2 Absorbance-concentration (beta) curves (a) 500 nm; (b) 485 nm. The resulted curves in this case gave an obvious turning at about 1: 1.7 mole ratio of **1** vs beta.
